# Supplementary material for: The impact of vaccination on COVID-19 outbreaks in the United States
Source: bioRxiv or medRxiv preprint supplement (doi:10.1101/2020.11.27.20240051), 2021-01-02
Supplement: Supplementary file [file media-1.pdf]

## Appendix

### The impact of vaccination on COVID-19 outbreaks in the United States

Seyed M. Moghadas,<sup>1</sup> Thomas N. Vilches,<sup>2</sup> Kevin Zhang,<sup>3</sup> Chad R. Wells,<sup>4</sup> Affan Shoukat,<sup>4</sup> Burton H. Singer,<sup>5</sup> Lauren Ancel Meyers,<sup>7</sup> Kathleen M. Neuzil,<sup>6</sup> Joanne M. Langley,<sup>8</sup> Meagan C. Fitzpatrick,<sup>6</sup> Alison P. Galvani<sup>4</sup>

<sup>1</sup> Agent-Based Modelling Laboratory, York University, Toronto, Ontario, M3J 1P3 Canada

<sup>2</sup> Institute of Mathematics, Statistics and Scientific Computing, University of Campinas, Campinas SP, Brazil

<sup>3</sup> Faculty of Medicine, University of Toronto, Toronto, Ontario, M5S 1A8 Canada

<sup>4</sup> Center for Infectious Disease Modeling and Analysis (CIDMA), Yale School of Public Health, New Haven, Connecticut, USA

<sup>5</sup> Emerging Pathogens Institute, University of Florida, Gainesville, FL 32610, USA

<sup>6</sup> Center for Vaccine Development and Global Health, University of Maryland School of Medicine, 685 W Baltimore St, Baltimore, MD 21201 USA

<sup>7</sup> Department of Integrative Biology, The University of Texas at Austin, Austin, TX 78712 USA

<sup>8</sup> Canadian Center for Vaccinology, Dalhousie University, IWK Health Centre and Nova Scotia Health Authority, Halifax, Nova Scotia, B3K 6R8 Canada

This appendix provides further details of model parameterization, projections of attack rates and outcomes with vaccination, and additional results with a 20% vaccine coverage.

**Table A1.** Percentage of population in different age groups with and without comorbidities.

| Condition                           | 0-4  | 5-19  | 20-49 | 50-64 | 65+   | All age groups |
|-------------------------------------|------|-------|-------|-------|-------|----------------|
| With comorbidity                    | 5%   | 10%   | 28%   | 55%   | 78%   | 37%            |
| Without comorbidity                 | 95%  | 90%   | 72%   | 45%   | 22%   | 63%            |
| <b>Fraction of total population</b> | 5.9% | 18.9% | 39.6% | 18.9% | 16.6% | 100%           |

The daily number of contacts for each agent was sampled from an age-specific negative-binomial distribution and contacts were distributed among different age groups based on a contact matrix (Table A2).

**Table A2.** Mixing patterns and the daily number of contacts derived from empirical observations. Daily numbers of contacts were sampled from negative binomial distributions for different scenarios.

| Age group    | Proportion of contacts between age groups |        |        |        |        | Number of daily contacts without self-isolation<br>Mean (SD) | Number of daily contacts for self-isolated individuals<br>Mean (SD) |
|--------------|-------------------------------------------|--------|--------|--------|--------|--------------------------------------------------------------|---------------------------------------------------------------------|
|              | 0-4                                       | 5-19   | 20-49  | 50-65  | 65+    |                                                              |                                                                     |
| <b>0-4</b>   | 0.2287                                    | 0.1839 | 0.4219 | 0.1116 | 0.0539 | 10.21 (7.65)                                                 | 2.86 (2.14)                                                         |
| <b>5-19</b>  | 0.0276                                    | 0.5964 | 0.2878 | 0.0591 | 0.0291 | 16.793<br>(11.7201)                                          | 4.70 (3.28)                                                         |
| <b>20-49</b> | 0.0376                                    | 0.1454 | 0.6253 | 0.1423 | 0.0494 | 13.795<br>(10.5045)                                          | 3.86 (2.95)                                                         |
| <b>50-65</b> | 0.0242                                    | 0.1094 | 0.4867 | 0.2723 | 0.1074 | 11.2669<br>(9.5935)                                          | 3.15 (2.66)                                                         |
| <b>65+</b>   | 0.0207                                    | 0.1083 | 0.4071 | 0.2193 | 0.2446 | 8.0027 (6.9638)                                              | 2.24 (1.95)                                                         |

**Table A3.** Distribution of the levels of pre-existing immunity in different age groups before vaccine implementation.

| Pre-existing immunity | 0-4   | 5-19  | 20-49 | 50-64 | 65-79 | 80+  |
|-----------------------|-------|-------|-------|-------|-------|------|
| 5%                    | 2.5%  | 7.4%  | 6.2%  | 3.7%  | 1.6%  | 1.6% |
| 10%                   | 5.4%  | 14.4% | 12.4% | 7.5%  | 3.6%  | 3.7% |
| 20%                   | 11.7% | 26.9% | 24.6% | 16.2% | 8.0%  | 8.3% |

## Estimates of attack rates, Hospitalizations, and deaths with 40% vaccine coverage

**Table A4.** Projected age-specific and overall attack per 10,000 population with 40% vaccination coverage, compared to no vaccination, corresponding to Figures 2 and 3 of the main text.

| Age group             | 0-4                                                         | 5-19                       | 20-49                      | 50-64                      | 65-79                        | 80+                           | All                      |
|-----------------------|-------------------------------------------------------------|----------------------------|----------------------------|----------------------------|------------------------------|-------------------------------|--------------------------|
| Pre-existing immunity | <b>Projected attack rate % (95% CI) without vaccination</b> |                            |                            |                            |                              |                               |                          |
| 5%                    | <b>0.28</b><br>0.25 - 0.32                                  | <b>2.0</b><br>1.8 - 2.3    | <b>3.8</b><br>3.4 - 4.3    | <b>1.2</b><br>1.1 - 1.4    | <b>0.23</b><br>0.21 - 0.26   | <b>0.31</b><br>0.27 - 0.34    | <b>7.9</b><br>7.0 - 9.8  |
| 10%                   | <b>0.26</b><br>0.23 - 0.29                                  | <b>1.8</b><br>1.6 - 2.0    | <b>3.4</b><br>3.1 - 3.8    | <b>1.1</b><br>1.0 - 1.3    | <b>0.22</b><br>0.19 - 0.24   | <b>0.29</b><br>0.25 - 0.32    | <b>7.1</b><br>6.3 - 7.9  |
| 20%                   | <b>0.24</b><br>0.21 - 0.27                                  | <b>1.5</b><br>1.3 - 1.6    | <b>2.9</b><br>2.6 - 3.2    | <b>1.0</b><br>0.91 - 1.13  | <b>0.21</b><br>0.19 - 0.24   | <b>0.28</b><br>0.25 - 0.31    | <b>6.2</b><br>5.4 - 6.9  |
|                       | <b>Projected attack rate % (95% CI) with vaccination</b>    |                            |                            |                            |                              |                               |                          |
| 5%                    | <b>0.08</b><br>0.07 - 0.09                                  | <b>0.8</b><br>0.7 - 0.9    | <b>0.8</b><br>0.74 - 0.95  | <b>0.24</b><br>0.21 - 0.27 | <b>0.034</b><br>0.03 - 0.04  | <b>0.047</b><br>0.041 - 0.052 | <b>2.0</b><br>1.7 - 1.3  |
| 10%                   | <b>0.07</b><br>0.057 - 0.077                                | <b>0.58</b><br>0.51 - 0.66 | <b>0.64</b><br>0.56 - 0.74 | <b>0.19</b><br>0.17 - 0.22 | <b>0.03</b><br>0.025 - 0.034 | <b>0.39</b><br>0.034 - 0.045  | <b>1.6</b><br>1.3 - 1.8  |
| 20%                   | <b>0.06</b><br>0.05 - 0.07                                  | <b>0.49</b><br>0.43 - 0.57 | <b>0.58</b><br>0.50 - 0.66 | <b>0.18</b><br>0.16 - 0.21 | <b>0.03</b><br>0.027 - 0.035 | <b>0.04</b><br>0.034 - 0.045  | <b>1.39</b><br>1.2 - 1.6 |

**Table A5.** Projected age-specific and overall non-ICU hospitalizations per 10,000 population with 40% vaccination coverage, compared to no vaccination, corresponding to Figure 4 of the main text.

| Age group             | 0-4                                                                          | 5-19                       | 20-49                      | 50-64                      | 65-79                      | 80+                        | All                        |
|-----------------------|------------------------------------------------------------------------------|----------------------------|----------------------------|----------------------------|----------------------------|----------------------------|----------------------------|
| Pre-existing immunity | <b>Projected total non-ICU hospitalizations (95% CI) without vaccination</b> |                            |                            |                            |                            |                            |                            |
| 5%                    | <b>0.1</b><br>0.07 - 0.11                                                    | <b>1.06</b><br>0.93 - 1.20 | <b>4.8</b><br>4.29 - 5.41  | <b>5.8</b><br>5.19 - 6.49  | <b>3.2</b><br>2.87 - 3.63  | <b>4.7</b><br>4.19 - 5.25  | <b>19.7</b><br>17.8 - 22.0 |
| 10%                   | <b>0.08</b><br>0.065 - 0.11                                                  | <b>1.0</b><br>0.87 - 1.13  | <b>4.22</b><br>3.72 - 4.75 | <b>5.4</b><br>4.78 - 6.04  | <b>3.1</b><br>2.74 - 3.48  | <b>4.2</b><br>3.76 - 4.76  | <b>18.0</b><br>15.8 - 20.1 |
| 20%                   | <b>0.05</b><br>0.04 - 0.07                                                   | <b>0.8</b><br>0.7 - 0.9    | <b>3.7</b><br>3.22 - 4.09  | <b>4.8</b><br>4.22 - 5.29  | <b>3.0</b><br>2.68 - 3.37  | <b>4.4</b><br>3.8 - 4.8    | <b>16.6</b><br>14.8 - 18.6 |
|                       | <b>Projected total non-ICU hospitalizations (95% CI) with vaccination</b>    |                            |                            |                            |                            |                            |                            |
| 5%                    | <b>0.02</b><br>0.012 - 0.031                                                 | <b>0.43</b><br>0.36 - 0.49 | <b>0.9</b><br>0.77 - 1.04  | <b>0.9</b><br>0.81 - 1.07  | <b>0.4</b><br>0.29 - 0.41  | <b>0.6</b><br>0.48 - 0.65  | <b>3.2</b><br>2.8 - 3.6    |
| 10%                   | <b>0.02</b><br>0.011 - 0.027                                                 | <b>0.34</b><br>0.27 - 0.39 | <b>0.69</b><br>0.59 - 0.80 | <b>0.84</b><br>0.72 - 0.98 | <b>0.31</b><br>0.26 - 0.37 | <b>0.47</b><br>0.39 - 0.55 | <b>2.7</b><br>2.3 - 3.1    |
| 20%                   | <b>0.01</b><br>0.006 - 0.02                                                  | <b>0.23</b><br>0.19 - 0.28 | <b>0.67</b><br>0.57 - 0.77 | <b>0.69</b><br>0.59 - 0.79 | <b>0.31</b><br>0.26 - 0.36 | <b>0.46</b><br>0.39 - 0.53 | <b>2.4</b><br>2.1 - 2.7    |

**Table A6.** Projected age-specific and overall ICU hospitalizations per 10,000 population with 40% vaccination coverage, compared to no vaccination, corresponding to Figure 4 of the main text.

| Age group             | 0-4                                                                      | 5-19                       | 20-49                      | 50-64                      | 65-79                      | 80+                        | All                        |
|-----------------------|--------------------------------------------------------------------------|----------------------------|----------------------------|----------------------------|----------------------------|----------------------------|----------------------------|
| Pre-existing immunity | <b>Projected total ICU hospitalizations (95% CI) without vaccination</b> |                            |                            |                            |                            |                            |                            |
| 5%                    | <b>0.03</b><br>0.02 - 0.04                                               | <b>0.4</b><br>0.34 - 0.47  | <b>2.0</b><br>1.8 - 2.3    | <b>2.7</b><br>2.36 - 2.98  | <b>1.58</b><br>1.39 - 1.78 | <b>2.3</b><br>1.99 - 2.52  | <b>9.0</b><br>7.9 - 10.1   |
| 10%                   | <b>0.03</b><br>0.02 - 0.04                                               | <b>0.37</b><br>0.31 - 0.43 | <b>1.8</b><br>1.59 - 2.01  | <b>2.5</b><br>2.24 - 2.84  | <b>1.5</b><br>1.28 - 1.65  | <b>2.1</b><br>1.84 - 2.36  | <b>8.3</b><br>7.4 - 9.2    |
| 20%                   | <b>0.03</b><br>0.019 - 0.039                                             | <b>0.3</b><br>0.26 - 0.35  | <b>1.6</b><br>1.37 - 1.77  | <b>2.3</b><br>2.0 - 2.5    | <b>1.5</b><br>1.29 - 1.68  | <b>2.1</b><br>1.87 - 2.35  | <b>7.7</b><br>6.9 - 8.6    |
|                       | <b>Projected total ICU hospitalizations (95% CI) with vaccination</b>    |                            |                            |                            |                            |                            |                            |
| 5%                    | <b>0.01</b><br>0.005 - 0.02                                              | <b>0.2</b><br>0.16 - 0.23  | <b>0.37</b><br>0.31 - 0.43 | <b>0.48</b><br>0.41 - 0.56 | <b>0.17</b><br>0.14 - 0.21 | <b>0.23</b><br>0.19 - 0.28 | <b>1.45</b><br>1.25 - 1.65 |
| 10%                   | <b>0.02</b><br>0.01 - 0.03                                               | <b>0.13</b><br>0.11 - 0.16 | <b>0.3</b><br>0.24 - 0.35  | <b>0.4</b><br>0.33 - 0.46  | <b>0.16</b><br>0.13 - 0.19 | <b>0.22</b><br>0.18 - 0.26 | <b>1.2</b><br>1.0 - 1.4    |
| 20%                   | <b>0.2</b><br>0.01 - 0.026                                               | <b>0.13</b><br>0.11 - 0.17 | <b>0.3</b><br>0.24 - 0.35  | <b>0.4</b><br>0.33 - 0.46  | <b>0.16</b><br>0.13 - 0.19 | <b>0.22</b><br>0.18 - 0.26 | <b>1.2</b><br>1.0 - 1.4    |

**Table A7.** Projected age-specific and overall deaths per 10,000 population with 40% vaccination coverage, compared to no vaccination, corresponding to Figure 4 of the main text.

| Age group             | 0-4                                                        | 5-19                          | 20-49                         | 50-64                      | 65-79                      | 80+                        | All                        |
|-----------------------|------------------------------------------------------------|-------------------------------|-------------------------------|----------------------------|----------------------------|----------------------------|----------------------------|
| Pre-existing immunity | <b>Projected total deaths (95% CI) without vaccination</b> |                               |                               |                            |                            |                            |                            |
| 5%                    | <b>0.004</b><br>0.001 - 0.01                               | <b>0.03</b><br>0.02 - 0.04    | <b>0.18</b><br>0.15 - 0.21    | <b>0.56</b><br>0.49 - 0.65 | <b>0.68</b><br>0.59 - 0.77 | <b>1.26</b><br>1.09 - 1.42 | <b>2.7</b><br>2.4 - 3.0    |
| 10%                   | <b>0.002</b><br>0 - 0.007                                  | <b>0.02</b><br>0.01 - 0.025   | <b>0.19</b><br>0.16 - 0.23    | <b>0.52</b><br>0.45 - 0.60 | <b>0.63</b><br>0.55 - 0.73 | <b>1.12</b><br>0.99 - 1.27 | <b>2.5</b><br>2.2 - 2.8    |
| 20%                   | <b>0.003</b><br>0.001 - 0.008                              | <b>0.013</b><br>0.007 - 0.022 | <b>0.14</b><br>0.12 - 0.18    | <b>0.48</b><br>0.42 - 0.56 | <b>0.68</b><br>0.58 - 0.78 | <b>1.15</b><br>1.03 - 1.32 | <b>2.5</b><br>2.2 - 2.8    |
|                       | <b>Projected total deaths (95% CI) with vaccination</b>    |                               |                               |                            |                            |                            |                            |
| 5%                    | <b>0</b><br>0 - 0                                          | <b>0.005</b><br>0.002 - 0.012 | <b>0.033</b><br>0.023 - 0.046 | <b>0.1</b><br>0.08 - 0.12  | <b>0.07</b><br>0.05 - 0.09 | <b>0.15</b><br>0.13 - 0.18 | <b>0.35</b><br>0.30 - 0.42 |
| 10%                   | <b>0</b><br>0 - 0                                          | <b>0.005</b><br>0.002 - 0.011 | <b>0.03</b><br>0.017 - 0.037  | <b>0.1</b><br>0.08 - 0.13  | <b>0.06</b><br>0.05 - 0.09 | <b>0.1</b><br>0.08 - 0.13  | <b>0.3</b><br>0.25 - 0.36  |
| 20%                   | <b>0</b><br>0 - 0                                          | <b>0.006</b><br>0.002 - 0.013 | <b>0.03</b><br>0.02 - 0.04    | <b>0.08</b><br>0.07 - 0.11 | <b>0.05</b><br>0.04 - 0.07 | <b>0.12</b><br>0.1 - 0.15  | <b>0.3</b><br>0.25 - 0.35  |

## Results for vaccination scenarios with 20% vaccine coverage

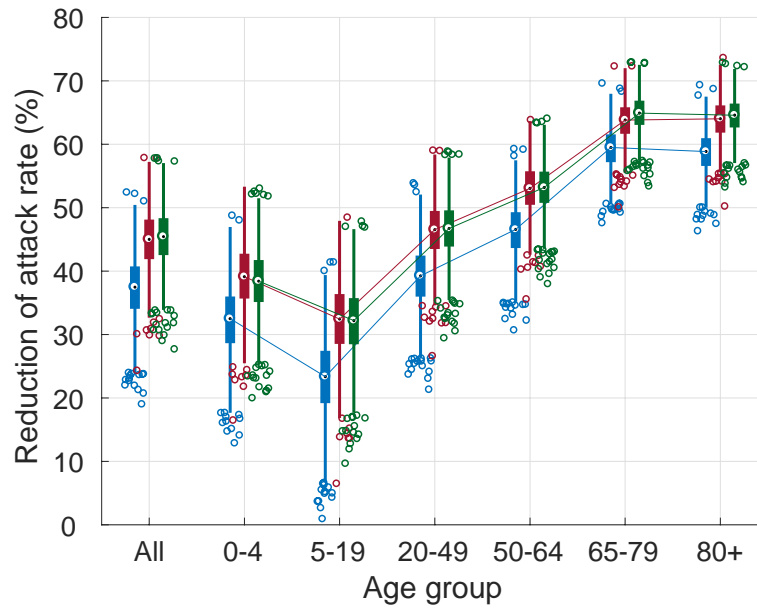

**Figure A1.** Overall and age-specific relative reduction of mean attack rates with vaccination, as compared to the outbreak scenario in the absence of vaccination, with 5% (blue), 10% (red), and 20% (green) levels of pre-existing immunity.

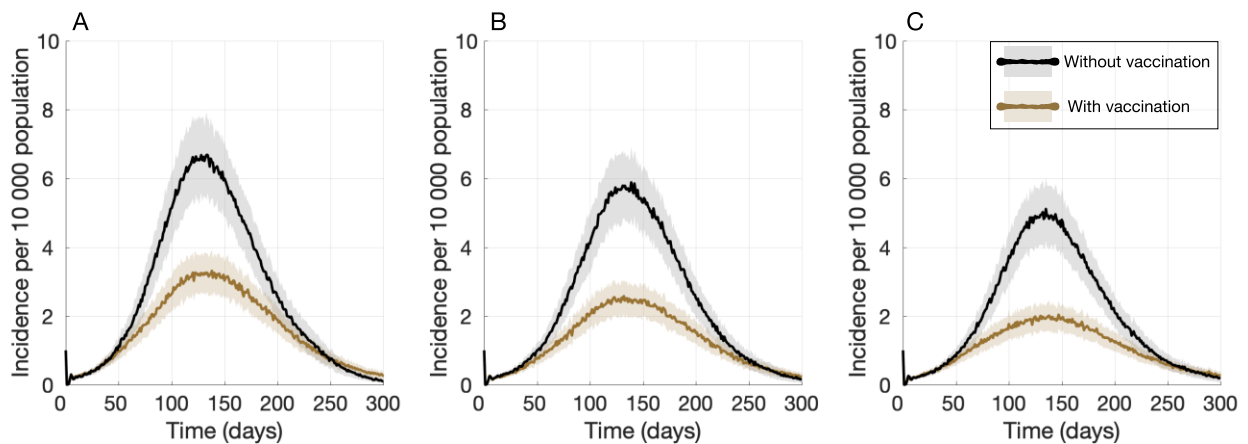

**Figure A2.** Projected daily incidence of COVID-19 per 10,000 population with 5% (A), 10% (B), and 20% (C) levels of pre-existing immunity.

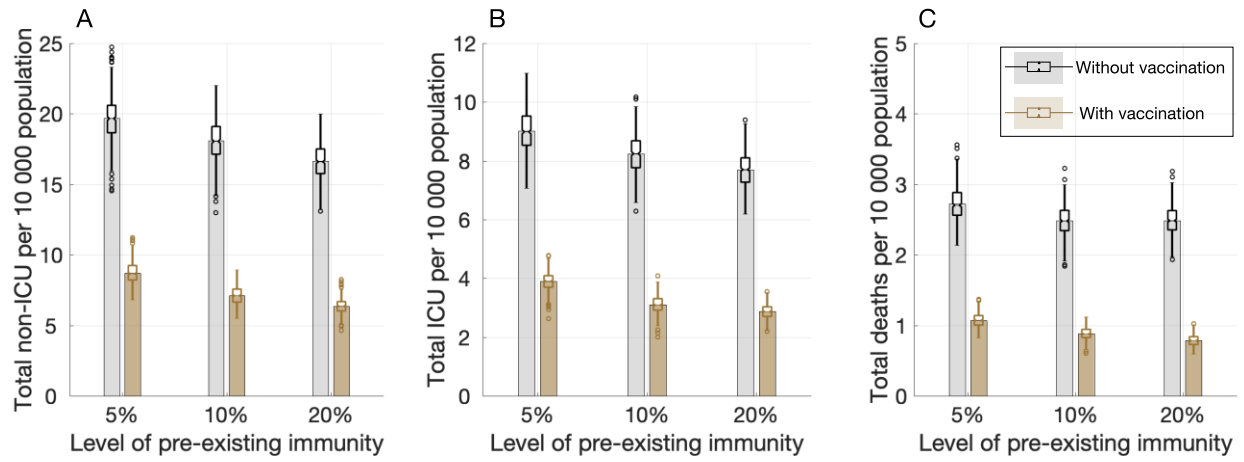

**Figure A3.** Projected daily number of non-ICU hospitalizations (A), ICU hospitalizations (B), and deaths (C) with 5%, 10%, and 20% levels of pre-existing immunity.
